# Supplementary material for: A colorimetric and “turn-on” fluorimetric chemosensor for the selective detection of cyanide and its application in food samples
Source: Royal Society of Chemistry journal article supplement (doi:10.1039/c6ra16378e), 2016-01-01
Supplement: c6ra16378e1.pdf [file c6ra16378e1.pdf]

*Electronic Supplementary Material*

**A colorimetric and “turn-on” fluorimetric chemosensor for  
selective detection of cyanide and its application in food  
sample**

Jing-Han Hu,<sup>\*a</sup> You Sun,<sup>a</sup> Jing Qi,<sup>a</sup> Peng-Xiang Pei,<sup>a</sup> Qi Lin,<sup>b</sup> You-Ming Zhang<sup>b</sup>

-----  
E-mail: [hujinghan62@163.com](mailto:hujinghan62@163.com)\*

-----  
<sup>a</sup> College of Chemical and Biological Engineering, Lanzhou Jiaotong University,  
Lanzhou, Gansu, 730070, P. R. China

E-mail: [hujinghan62@163.com](mailto:hujinghan62@163.com)

<sup>b</sup> College of Chemical and Chemical Engineering, Northwest Normal University,  
Lanzhou, Gansu, 730070, P. R. China

E-mail address: [zhangnwnu@126.com](mailto:zhangnwnu@126.com).

## CONTENTS

|                                                                                                                                                                                                                                                                                                                                                                                                                            |    |
|----------------------------------------------------------------------------------------------------------------------------------------------------------------------------------------------------------------------------------------------------------------------------------------------------------------------------------------------------------------------------------------------------------------------------|----|
| 1. General Methods .....                                                                                                                                                                                                                                                                                                                                                                                                   | 2  |
| 2. Synthesis of sensor molecule HY .....                                                                                                                                                                                                                                                                                                                                                                                   | 4  |
| 3. <sup>1</sup> H NMR spectrum of HY .....                                                                                                                                                                                                                                                                                                                                                                                 | 5  |
| 4. <sup>13</sup> C NMR spectrum of HY .....                                                                                                                                                                                                                                                                                                                                                                                | 6  |
| 5. Mass spectrum of HY.....                                                                                                                                                                                                                                                                                                                                                                                                | 7  |
| 6. Determination of Detection Limit.....                                                                                                                                                                                                                                                                                                                                                                                   | 8  |
| 7. The UV-vis and fluorescence spectra of HY adding F <sup>-</sup> , Cl <sup>-</sup> , Br <sup>-</sup> , I <sup>-</sup> , AcO <sup>-</sup> ,<br>H <sub>2</sub> PO <sub>4</sub> <sup>-</sup> , HSO <sub>4</sub> <sup>-</sup> , ClO <sub>4</sub> <sup>-</sup> , CN <sup>-</sup> and SCN <sup>-</sup> dissolved in pure water (50 equiv.) in<br>the DMSO/H <sub>2</sub> O (v/v = 7:3) solution (λ <sub>ex</sub> =375 nm)..... | 9  |
| 8. Mass spectrum change of HY + CN <sup>-</sup> .....                                                                                                                                                                                                                                                                                                                                                                      | 10 |
| 9. Effect of pH the UV-vis and fluorescence spectra of HY + CN <sup>-</sup> .....                                                                                                                                                                                                                                                                                                                                          | 11 |
| 10. A part of the literatures were provided in the followed table:.....                                                                                                                                                                                                                                                                                                                                                    | 12 |

## 1. General Methods

Fresh double distilled water was used throughout the experiment. All other reagents and solvents were commercially available at analytical grade and were used without further purification.  $^1\text{H}$  NMR and  $^{13}\text{C}$  NMR spectra were recorded on an Agilent DD2 at 600 MHz spectra.  $^1\text{H}$  chemical shifts are reported in ppm downfield from tetramethylsilane (TMS,  $\delta$  scale) with the solvent resonances as internal standards. UV–visible spectra were recorded on a Shimadzu UV–2550 spectrometer. Photoluminescence spectra were performed on a Shimadzu RF–5301 fluorescence spectrophotometer. Melting points were measured on an X–4 digital melting-point apparatus. The infrared spectra were performed on a Digilab FTS–3000 FT–IR spectrophotometer.

All the UV–vis experiments were carried out in DMSO on a Shimadzu UV–2550 spectrometer. Any changes in the UV–vis spectra of the synthesized compound kept the ligand concentration constant ( $2.0 \times 10^{-5}$  M) in all experiments. Tetrabutylammonium salt ( $1.0 \times 10^{-3}$  M) of anions ( $\text{F}^-$ ,  $\text{Cl}^-$ ,  $\text{Br}^-$ ,  $\text{I}^-$ ,  $\text{AcO}^-$ ,  $\text{H}_2\text{PO}_4^-$ ,  $\text{HSO}_4^-$  and  $\text{ClO}_4^-$ ) and sodium salt ( $1.0 \times 10^{-3}$  M) of anions ( $\text{CN}^-$  and  $\text{SCN}^-$ ) were used for the UV–vis experiments.

All the fluorescence spectroscopy was carried out in DMSO on a Shimadzu RF–5301 spectrometer. Any changes in the fluorescence spectra of the synthesized compound kept the ligand concentration constant ( $2.0 \times 10^{-5}$  M) in all experiments. Tetrabutylammonium salt ( $1.0 \times 10^{-3}$  M) of anions ( $\text{F}^-$ ,  $\text{Cl}^-$ ,  $\text{Br}^-$ ,  $\text{I}^-$ ,  $\text{AcO}^-$ ,  $\text{H}_2\text{PO}_4^-$ ,  $\text{HSO}_4^-$  and  $\text{ClO}_4^-$ ) and sodium salt ( $1.0 \times 10^{-3}$  M) of anions ( $\text{CN}^-$  and  $\text{SCN}^-$ ) were used for the fluorescence experiments

For  $^1\text{H}$ –NMR titrations, the solution of **HY** was prepared in  $\text{DMSO}-d_6$  and the appropriate concentrated solution of guest was prepared in  $\text{DMSO}-d_6$ . Aliquots of the two solutions were mixed directly in NMR tubes.

## 2. Synthesis of sensor molecule **HY**

The synthesis route of sensor **HY** is demonstrated in Scheme 1. An ethanol solution (25 mL) of 4-(Diethylamino)salicylaldehyde (0.966 g, 5 mmol), isonicotinyl hydrazide (0.685 g, 5 mmol) were stirred under reflux 4h. After cooling to room temperature, the yellow precipitate was filtered, washed with hot absolute ethanol three times, then recrystallized with ethanol to get yellow product **HY** in 88% yield. m. p 193°C-196°C. <sup>1</sup>H NMR (DMSO-d<sub>6</sub>, 400 MHz) δ: 11.98 (s, 1H), 11.25 (s, 1H), 8.76 (dd, 2H), 8.43 (s, 1H), 7.80(dd, 2H), 7.22 (d, 1H), 6.26 (dd, 1H), 6.11 (d, 1H), 3.35 (q, 4H), 1.09 (t, 6H); ESI-MS m/z: Calcd for [C<sub>17</sub>H<sub>20</sub>N<sub>4</sub>O<sub>2</sub> + H]<sup>+</sup> 313.16; Found [C<sub>17</sub>H<sub>20</sub>N<sub>4</sub>O<sub>2</sub> + H]<sup>+</sup> 313.20.

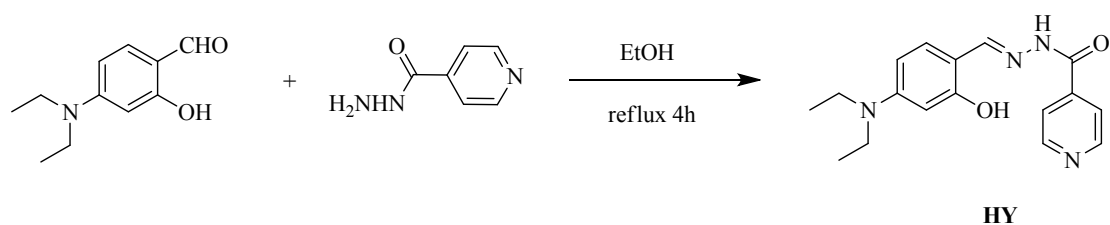

**Scheme S1** Synthesis of the sensor compound **HY**.

### 3. $^1\text{H}$ NMR spectrum of HY

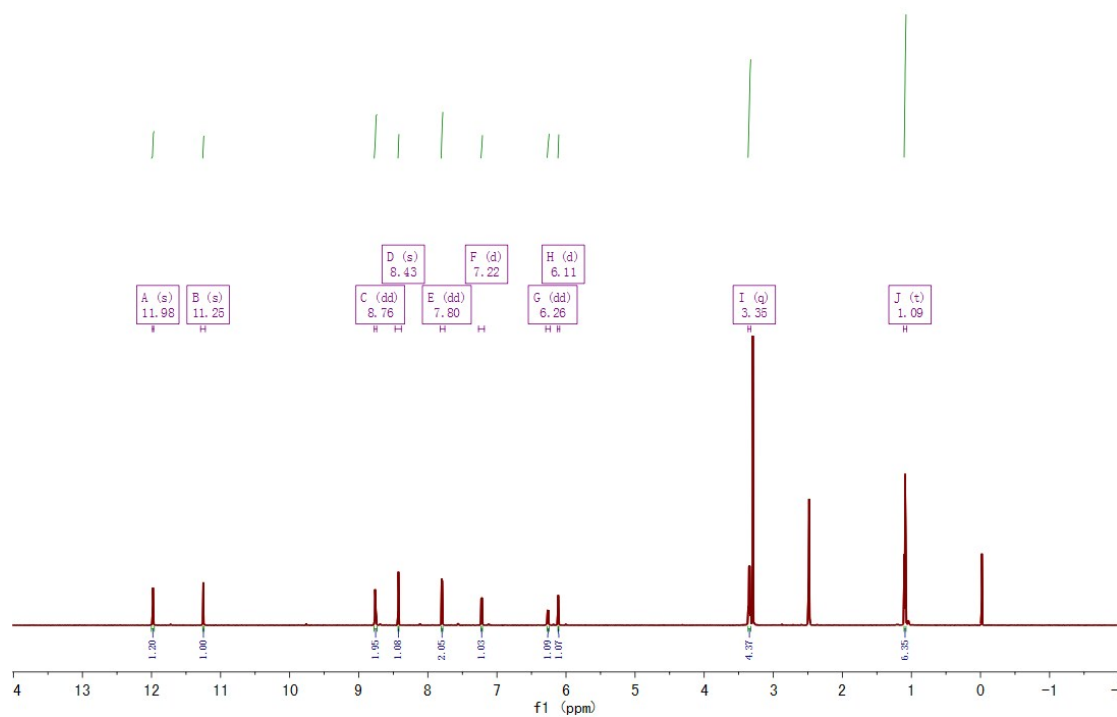

Fig. S1  $^1\text{H}$ -NMR spectrum of HY in  $\text{DMSO}-d_6$ .

#### 4. $^{13}\text{C}$ NMR spectrum of HY

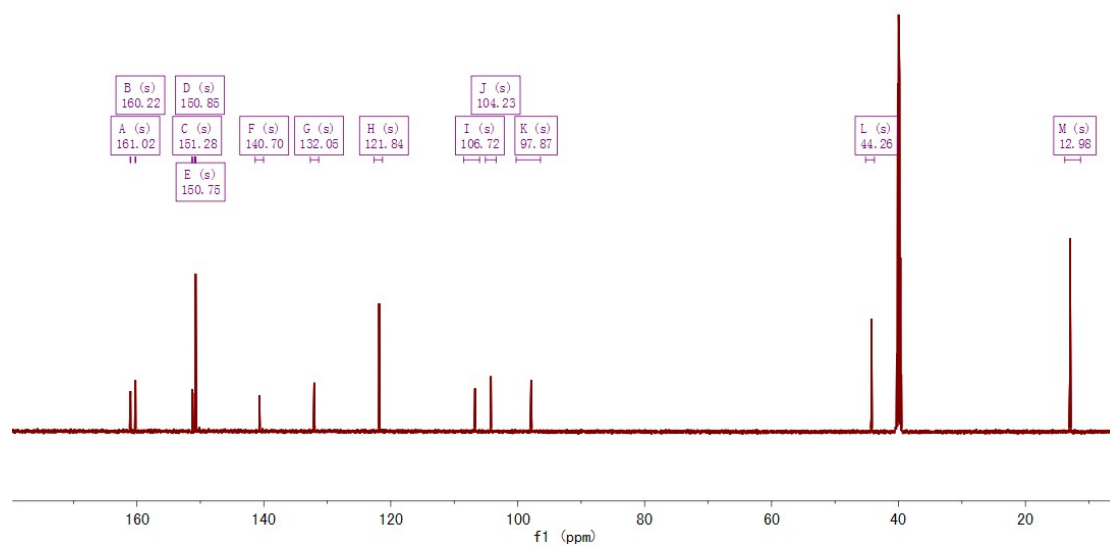

**Fig. S2**  $^{13}\text{C}$ -NMR spectrum of **HY** in  $\text{DMSO-}d_6$ .

## 5. Mass spectrum of HY

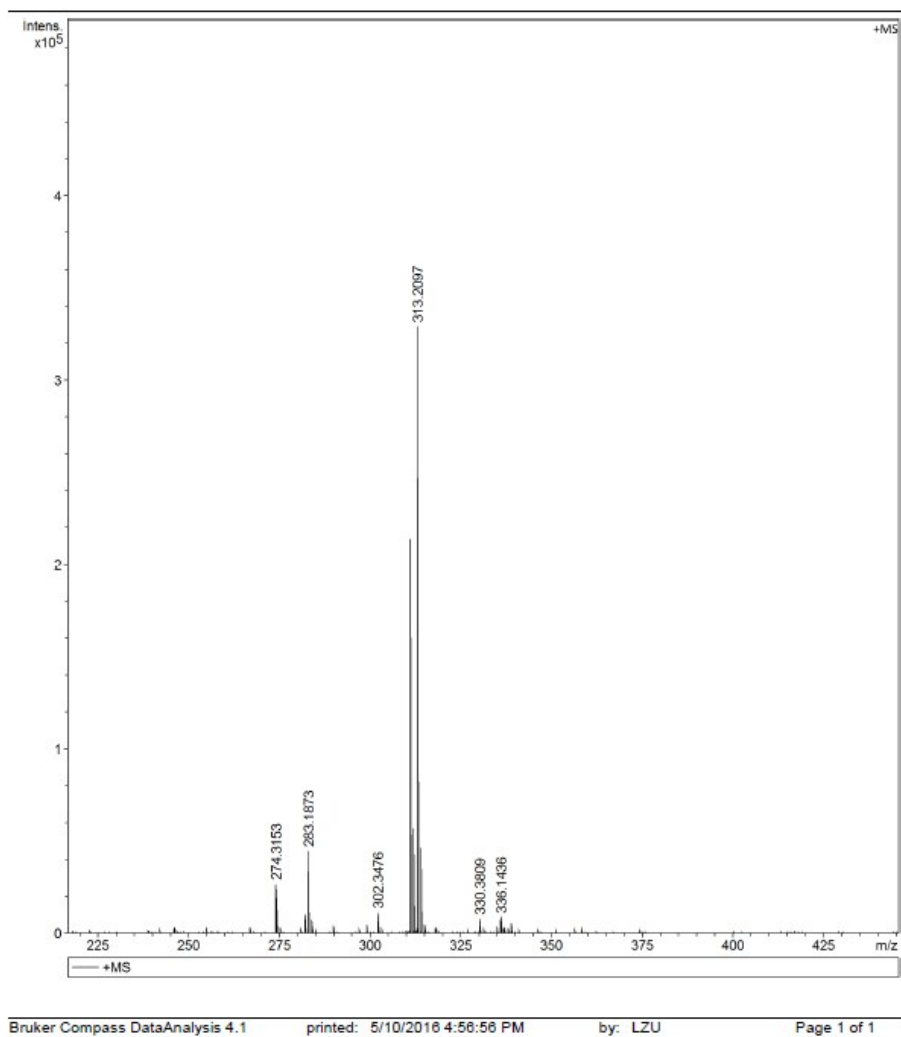

Fig. S3 Mass spectrum of HY.

## 6. Determination of Detection Limit

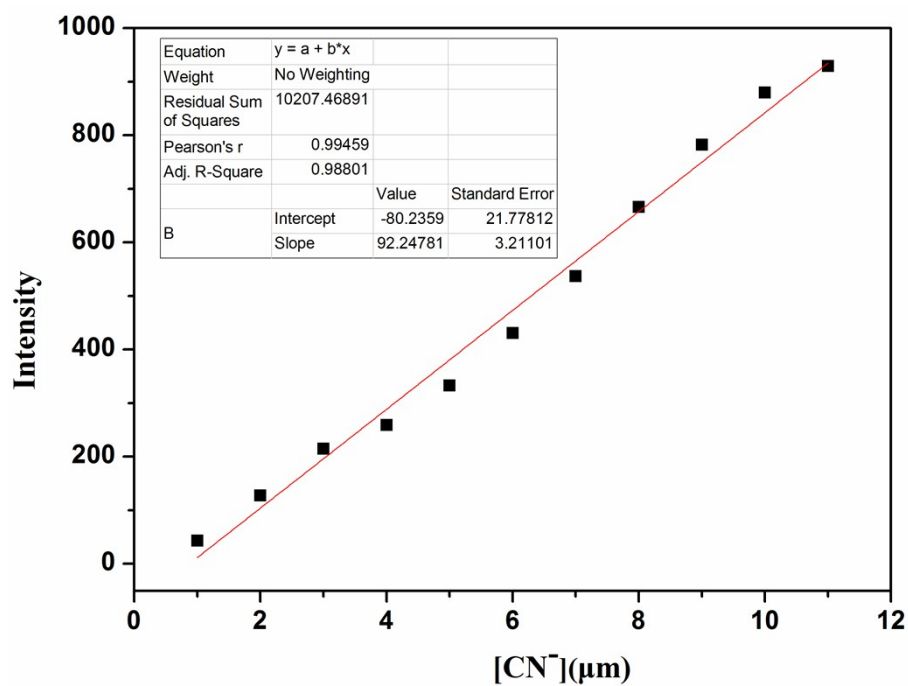

**Fig. S4** The photograph of the fluorescent spectrum linear range.

Linear Equation:  $Y = 92.24781 \times X - 80.2359$        $R = 0.98801$

$$S = 9.225 \times 10^7 \quad \delta = \sqrt{\frac{\sum(F - F)^2}{(N - 1)}} = 1.603 \quad (N = 10) \quad K = 3$$

$$\text{LOD} = K \times \delta/S = 5.21 \times 10^{-8} \text{ M}$$



**7. The UV-vis and fluorescence spectra of HY adding  $F^-$ ,  $Cl^-$ ,  $Br^-$ ,  $I^-$ ,  $AcO^-$ ,  $H_2PO_4^-$ ,  $HSO_4^-$ ,  $ClO_4^-$ ,  $CN^-$  and  $SCN^-$  dissolved in pure water (50 equiv.) in the DMSO/ $H_2O$  (v/v = 7:3) solution ( $\lambda_{ex}=375$  nm)**

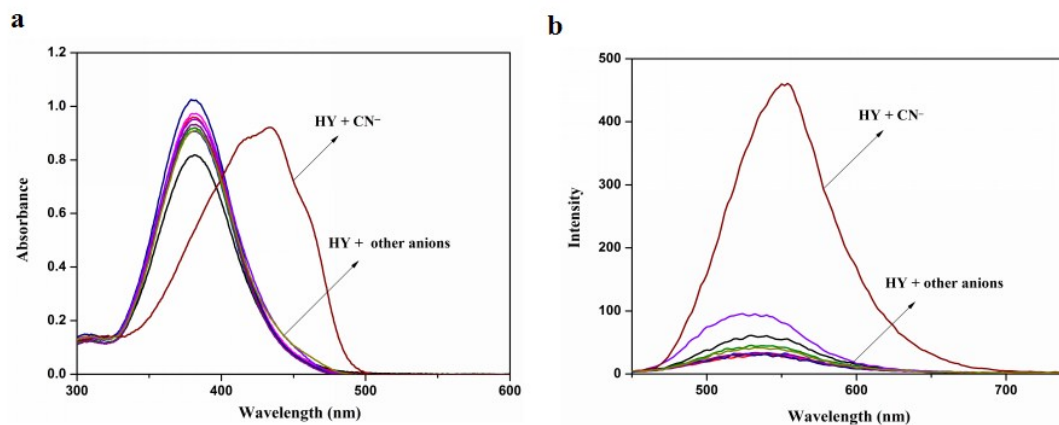

**Fig. S5** a) Absorbance spectra data b) Fluorescence emission data of **HY** adding  $F^-$ ,  $Cl^-$ ,  $Br^-$ ,  $I^-$ ,  $AcO^-$ ,  $H_2PO_4^-$ ,  $HSO_4^-$ ,  $ClO_4^-$ ,  $CN^-$  and  $SCN^-$  dissolved in pure water (50 equiv.) in the DMSO/ $H_2O$  (v/v = 7:3) solution ( $\lambda_{ex}=375$  nm).

## 8. Mass spectrum change of $\text{HY} + \text{CN}^-$ .

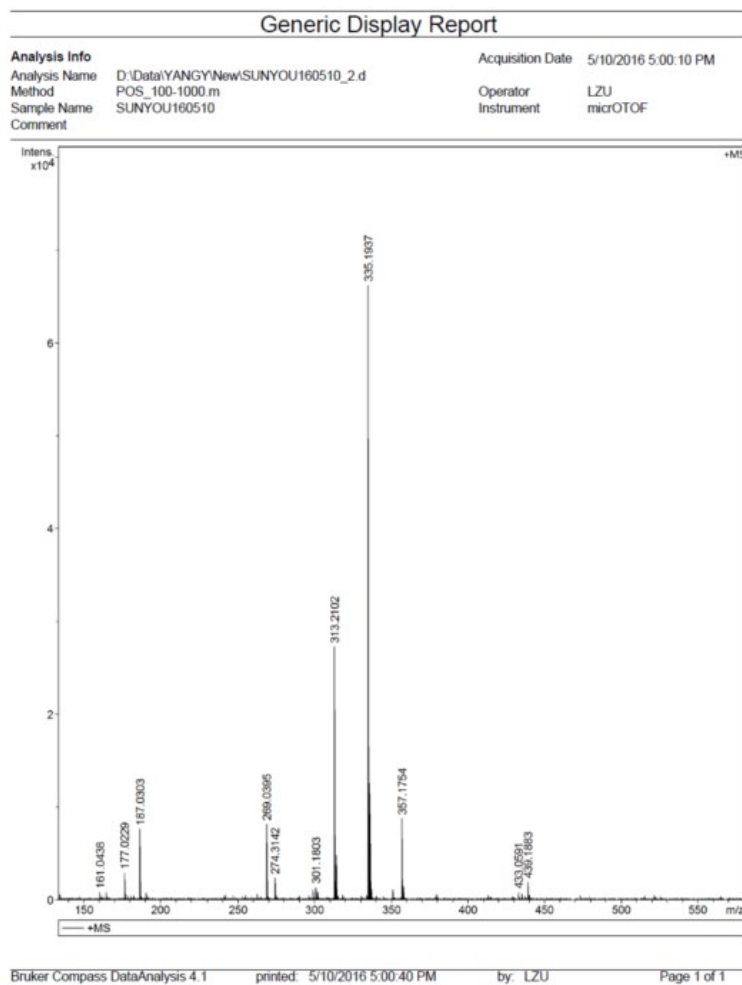

Fig. S6 Mass spectrum change of  $\text{HY} + \text{CN}^-$ .

## 9. Effect of pH the UV-vis and fluorescence spectra of HY + CN<sup>-</sup>.

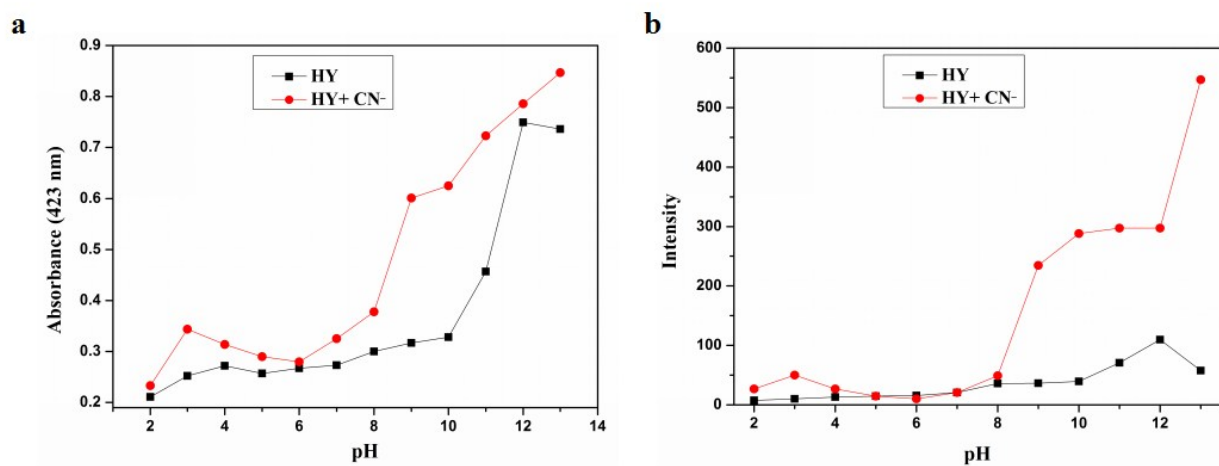

**Fig. S7** Effect of pH on the a) UV-vis and b) Fluorescence spectra of **HY** ( $2.0 \times 10^{-5}$  M) in

response to CN<sup>-</sup> (50 equiv.) from 2 to 13 in DMSO/H<sub>2</sub>O (v/v=7:3) solution.

**10. A part of the literatures were provided in the followed table:**

**Table S1:**

| Journal Year.<br>Volume.<br>Page    | Response channel                       | Water content                      | Detection limits                        | Application                                                                  | single crystal data |
|-------------------------------------|----------------------------------------|------------------------------------|-----------------------------------------|------------------------------------------------------------------------------|---------------------|
| This work                           | Colorimetric and fluorometric (Off-On) | DMSO/H <sub>2</sub> O (v/v = 7:3). | Fluorometric: 5.21 × 10 <sup>-8</sup> M | a) INHIBIT molecular logic gates; b) test trips; c) detection in food sample | Yes                 |
| Organic Letters 15 (2013) 2386–2389 | Fluorometric (Off-On)                  | DMSO/H <sub>2</sub> O (v/v = 99:1) | —                                       | —                                                                            | —                   |
| Talanta 152 (2016) 39–44            | Colorimetric and fluorometric (Off-On) | DMSO/buffer (v/v = 9:1)            | —                                       | —                                                                            | Yes                 |
| New J. Chem.39 (2015) 4041–4046     | Colorimetric and fluorometric (Off-On) | DMSO/H <sub>2</sub> O (v/v = 3:2)  | 1.2 × 10 <sup>-9</sup> M                | test trips                                                                   | —                   |
| Tetrahedron 72 (2016) 1244–1248     | Colorimetric and fluorometric (Off-On) | THF/H <sub>2</sub> O (v: v = 99:1) | —                                       | —                                                                            | —                   |
| Tetrahedron 70 (2014) 1889–1894     | Colorimetric and fluorometric (Off-On) | DMSO/H <sub>2</sub> O (v/v = 9:1)  | 4.0 × 10 <sup>-7</sup> M                | —                                                                            | Yes                 |

[1] T. F. Robbins, H. Qian, X. Su, R. P. Hughes, and I. Aprahamian, *Organic Lett.* 15 (2013) 2386–2389.

[2] L. Wan, Q. Shu, J. P. Zhu, S. Jin, N. Li, X. Chen, and S. Chen, *Talanta* 152 (2016) 39–44.

[3] J. H. Hu, J. B. Li, J. Qi and You Sun, *New J. Chem.*39 (2015) 4041–4046.

[4] Q. Zhang, J. Zhang, H. Zuo, C. Wang, and Y. Shen, *Tetrahedron* 72 (2016) 1244–1248.

[5] P. Zhang, B. B. Shi, X. M. You, Y. M. Zhang, Q. Lin, H. Yao, T. B. Wei, *Tetrahedron* 70 (2014) 1889–1894.
